# Supplementary material
Source: PubMed Central journal article supplement (PMC4959222)
Supplement: AEM.00570-16_zam999117289so1.pdf [file AEM.00570-16_zam999117289so1.pdf]

**Highly Thermostable Kanamycin Resistance Marker Expands the Toolkit for Genetic Manipulation of *Caldicellulosiruptor bescii***

Gina L. Lipscomb<sup>a</sup>, Jonathan M. Conway<sup>b</sup>, Sara E. Blumer-Schuetz<sup>b\*</sup>, Robert M. Kelly<sup>b</sup> and Michael W. W. Adams<sup>a#</sup>

<sup>a</sup>Department of Biochemistry and Molecular Biology, University of Georgia,  
Athens, GA 30602, USA

<sup>b</sup>Department of Chemical and Biomolecular Engineering, North Carolina State University,  
Raleigh, NC 27695-7905

#Address correspondence to Michael W. W. Adams, [adams@bmb.uga.edu](mailto:adams@bmb.uga.edu).

\*Current address: Department of Biological Sciences, Oakland University, Rochester, MI.

**Supplemental Material:**

**Figure S1**

**Figure S2**

**Figure S3**

**Figure S4**

**Figure S5**

**Figure S6**

# Figure S1

A

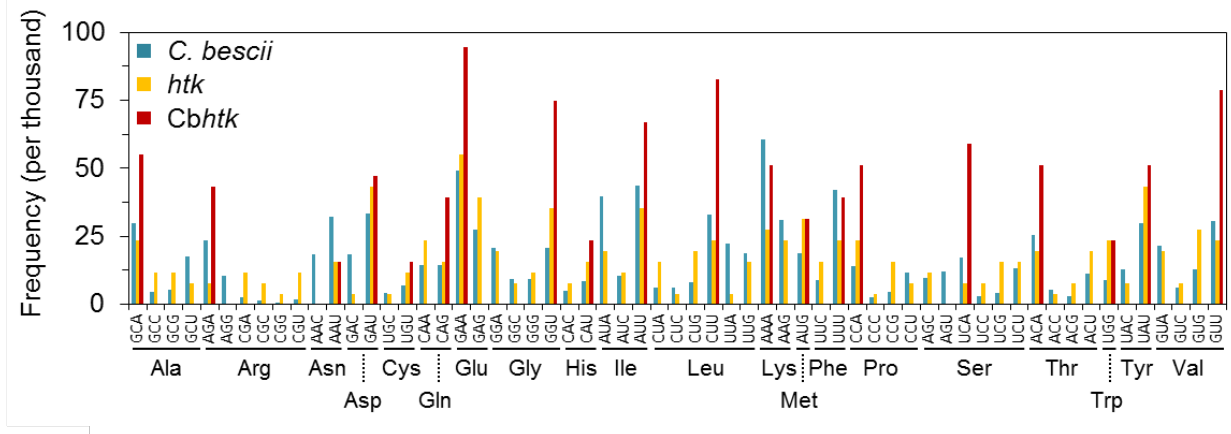

B

```

ATGAAAGGTCCAATTATTATGACAAGAGAAGAAAGAATGAAAATTGTTTCATGAAATTAAGAAAGAATTCTTGATAAAT
ATGGTGATGATGTTAAAGCAATTGGTGTTTATGGTTCACTTGGTAGACAGACAGATGGTCCATATTCAGATATTGAAAT
GATGTGTGTTCTTTCAACAGAAGGTGTTGAATTTTCATATGAATGGACAACAGGTGAATGGAAAGCAGAAGTTAATTTT
TATTCAGAAGAAATTCCTTCTTGATTATGCATCAAGAGTTGAACCAGATTGGCCACTTACACATGGTAGATTTTTTTCAA
TTCTTCCAATTTATGATCCAGGTGGTTATTTTGAAAAAGTTTATCAGACAGCAAAATCAGTTGAAGCACAGAAATTTCA
TGATGCAATTTGTGCACTTATTGTTGAAGAACTTTTTGAATATGCAGGTAAATGGAGAAATATTAGAGTTTCAGGGTCCA
ACAACATTTCTTCCATCACTTACAGTTTACAGTTTGAAGTTCAGTTGCAATGGCAGGTGCAATGCTTATTGGTCTTCATCATAGAATTTGTT
ATACAACATCAGCATCAGTTCTTACAGAAGCAGTTAAACAGCCAGATCTTCCACCAGGTTATGTTTTCAGCTTTGTCAGCT
TGTTATGTCAGGTCAGCTTTTCAGATCCAGAAAACTTCTTGAATCACTTGAAAATTTTTTGGAAATGGTGTTCAGGAATGG
GCAGAAAAGACATGGTTATATTGTTGATGTTTCAAAAAGAATTCATTTTAA
    
```

**Figure S1.** Codon optimization of *htk* for use in *C. bescii*. (A) Codon usage for *C. bescii* genome, *htk* (from pUB110) and codon-optimized *Cbhtk*. (B) Nucleotide sequence of codon-optimized *Cbhtk*.

**Figure S2**

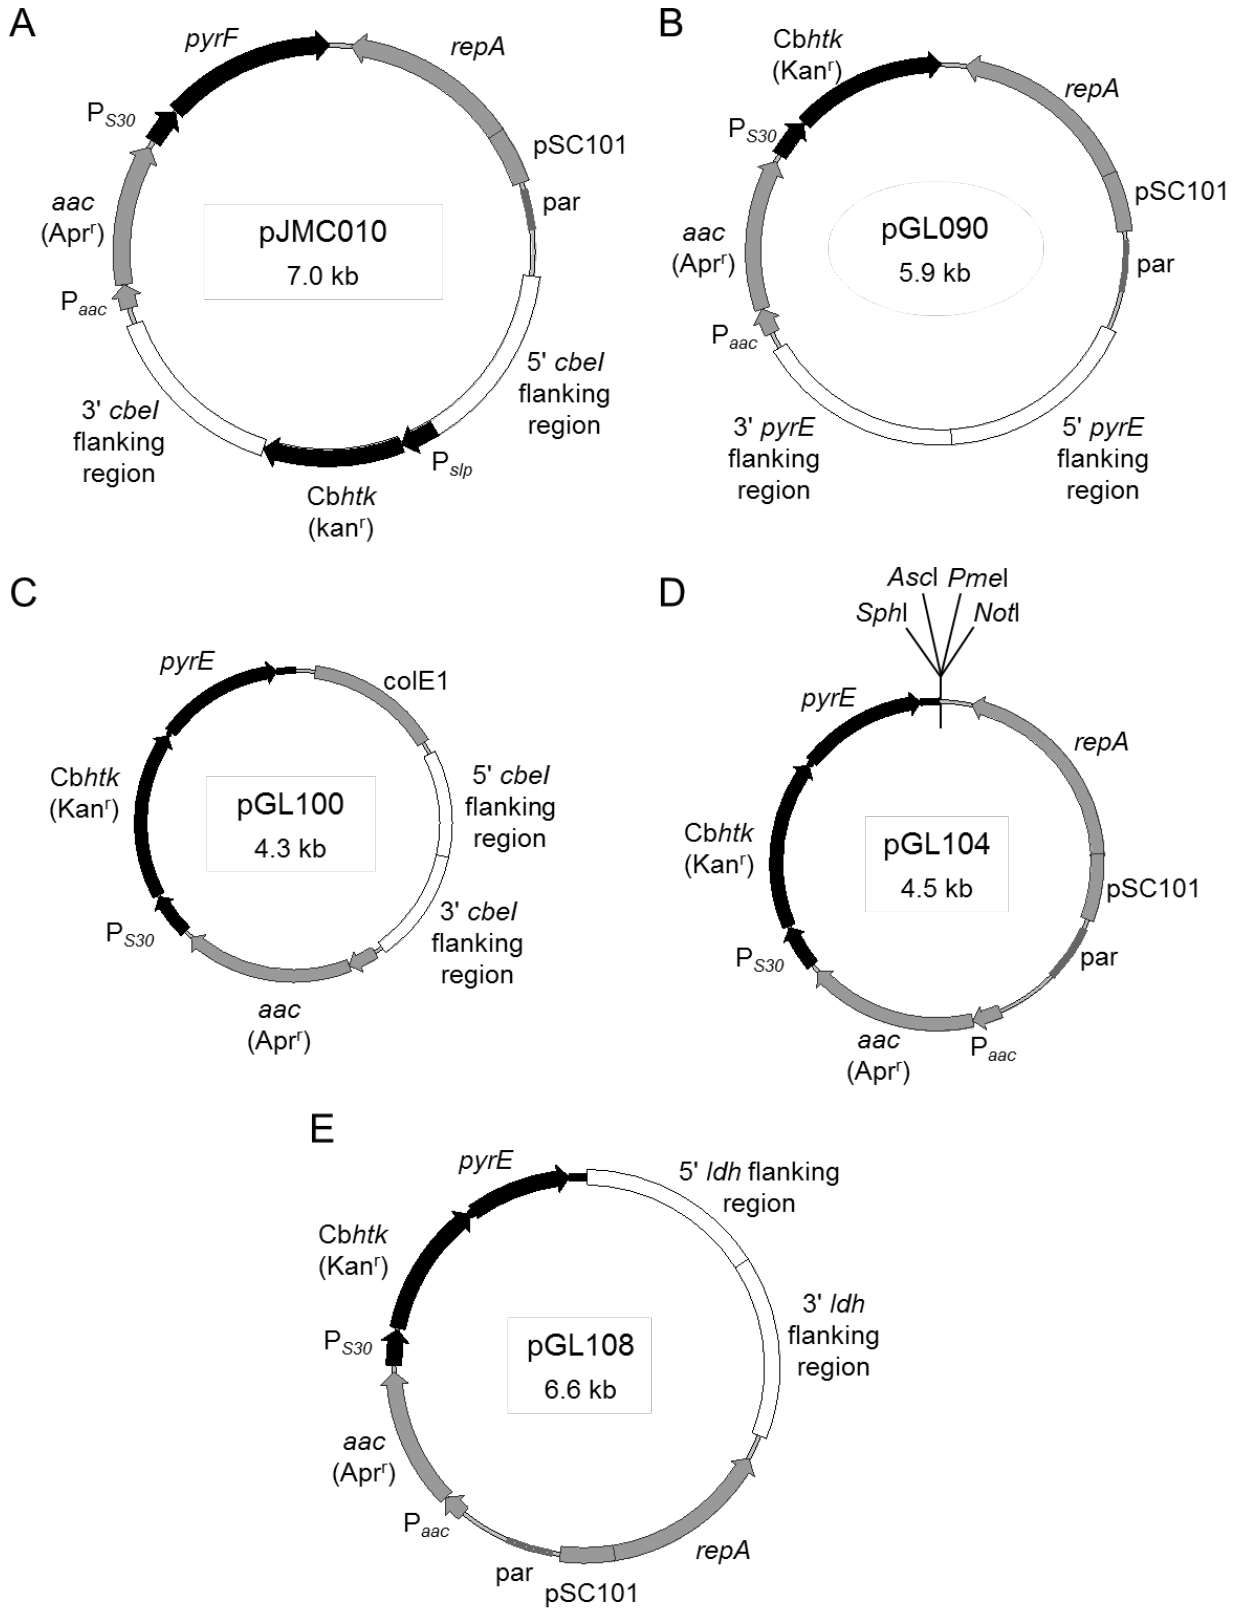

**Figure S2.** Plasmids used in *C. bescii* strain construction. (A) Plasmid for insertion of *Cbhtk* cassette into *C. bescii* JWCB018 chromosome at  $\Delta cbeI$  locus using selections based on *Cbhtk* and *pyrF*. (B) Plasmid for targeted deletion of *pyrE* from wild-type *C. bescii* using selection based on *Cbhtk*. (C) Plasmid for deletion of *cbeI* in MACB1018 using selections based on *Cbhtk* and *pyrE*. (D) Plasmid employing the *Cbhtk-pyrE* cassette and containing a mini multiple cloning site. (E) Plasmid for deletion of *ldh* in MACB1018 using selections based on *Cbhtk* and *pyrE*. For all plasmids shown, marker cassettes used for genetic selection in *C. bescii* are shown in black, *E. coli* elements are shown in grey, and flanking regions for homologous recombination are shown in white.

**Figure S3**

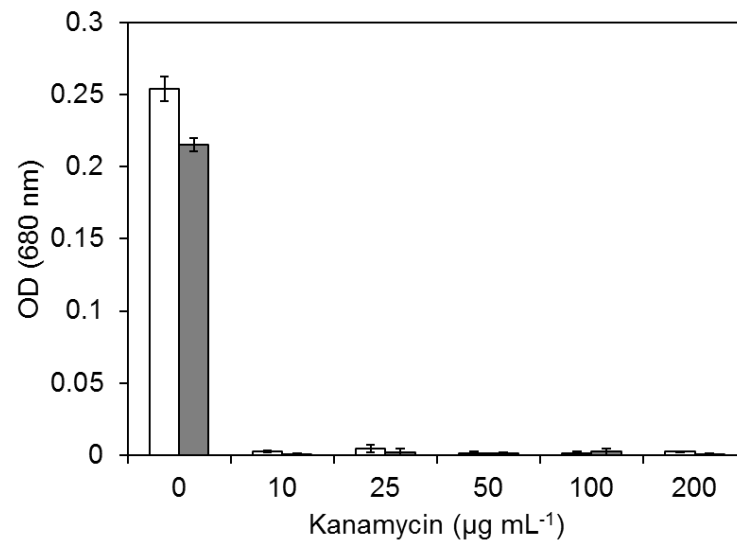

**Figure S3.** Kanamycin sensitivity of *C. bescii*. Wild-type (white bars) and JWCB018 (grey bars) were grown for 20 h in CC516 medium containing kanamycin at the indicated concentrations. Growth was measured by optical density at 680 nm. Error bars represent standard deviation;  $n = 3$ .

**Figure S4**

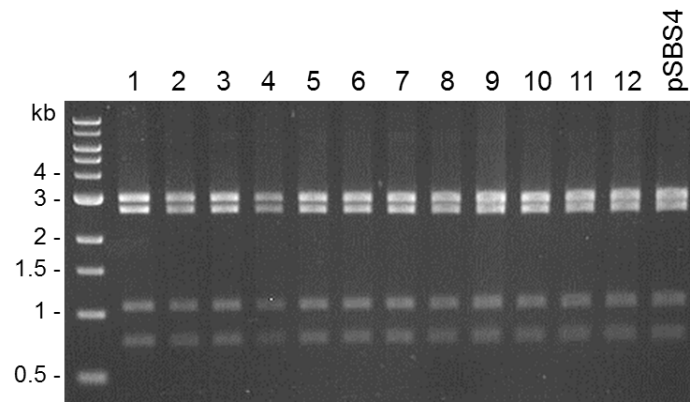

**Figure S4.** Confirmation of pSBS4 plasmid transformation of wild-type *C. bescii*. Total DNA from MACB1015 was transformed into *E. coli*, and plasmid isolates (1-12), along with purified pSBS4 as a control, were restriction digested with *Ava*I, resulting in expected fragment sizes of 3.0, 2.7, 1.1 and 0.8 kb.

**Figure S5**

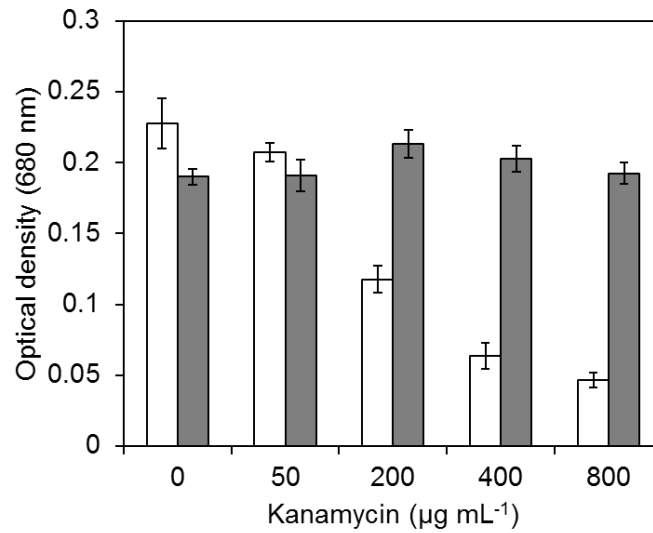

**Figure S5** Kanamycin resistance of strains containing a *Cbhtk* expression cassette. MACB1015 (white bars) and RKCB106 (grey bars) were grown for 20 h in CC516 medium with 20 µM uracil and containing kanamycin at the indicated concentrations. Growth was measured by optical density at 680 nm. Error bars represent standard deviation,  $n = 3$ .

**Figure S6**

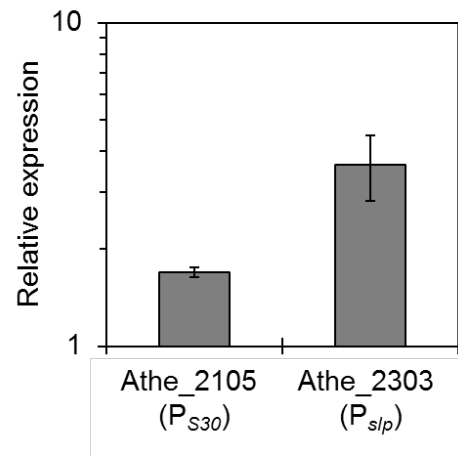

**Figure S6.** Expression levels of native genes downstream of P<sub>S30</sub> and P<sub>slp</sub> promoters. Wild-type *C. bescii* was grown to mid-log phase, RNA was extracted, and reverse-transcriptase quantitative PCR was performed using primer pairs targeting the Athe\_2105 and Athe\_2303 genes, downstream from the P<sub>S30</sub> and P<sub>slp</sub> promoters, respectively. Expression is shown relative to that of the control gene Athe\_1406, encoding the glycolytic enzyme GAPDH. Error bars represent standard deviation,  $n = 2$  technical replicates.
